# Supplementary material for: Evaluation of Electroencephalography Source Localization Algorithms with Multiple Cortical Sources
Source: PubMed Central journal article supplement (PMC4725774; doi:10.1371/journal.pone.0147266), 2016-01-25
Supplement: pone.0147266.s001.pdf [file pone.0147266.s001.pdf]

(a) Small Source

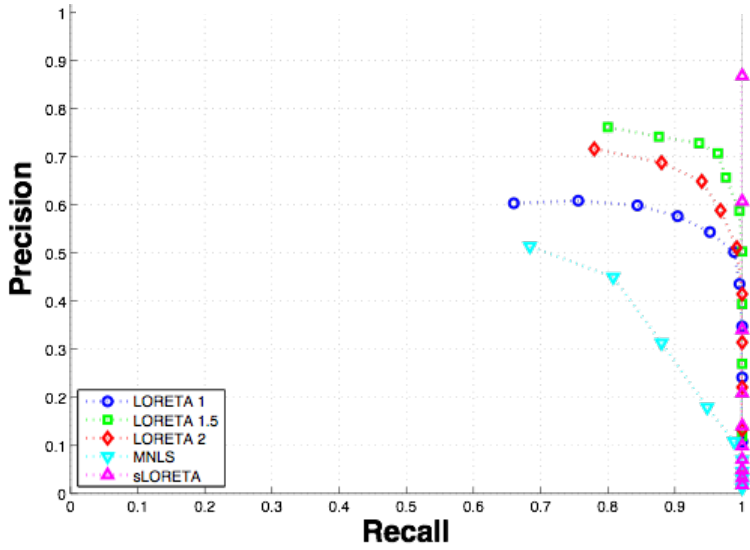

(b) Medium Source

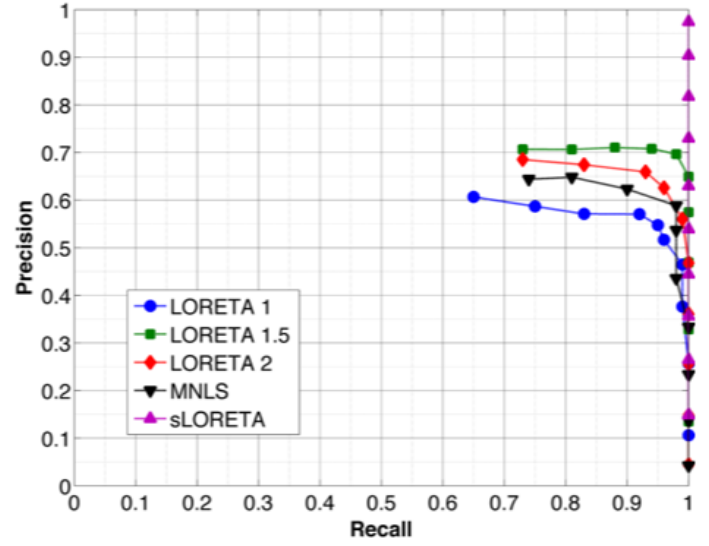

(c) Large Source

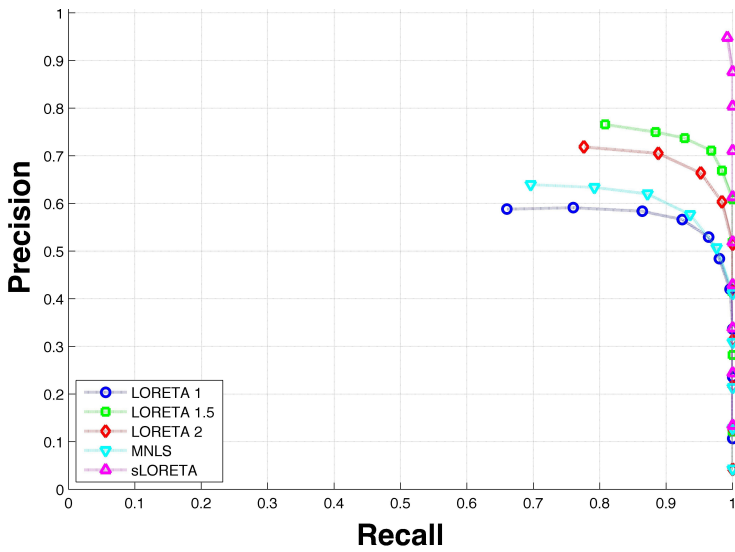

**Figure S1: Source size comparison.** Precision vs, Recall for each source localization algorithm tested for (a) one small (1 dipole) (b) one medium sized and (b) one large (30 dipole) simulated source.
